# Supplementary material for: Exploring the Chemical Space around Cannabis sativa L. Leaves as a Source of Bioactive Compounds of Pharmaceutical Interest
Source: Research Square preprint supplement (doi:10.21203/rs.3.rs-7941302/v1), 2025-11-10
Supplement: Supplementary file 1 [file 49e834e1b1a775b190917364.docx]

**Exploring the Chemical Space around *Cannabis sativa* L. Leaves as a Source of Bioactive Compounds of Pharmaceutical Interest**

Matilde Marani1§, Aurora Camola2§, Caterina Fantino1, Virginia Brighenti1, Massimo Tacchini3, Maria Eleonora Foletti3, Daniele Merli4, Gianni Sacchetti3, Federica Pollastro2*, Federica Pellati1*

1 Department of Life Sciences, University of Modena and Reggio Emilia, Via Giuseppe Campi 103, 41125 Modena, Italy

2 Department of Pharmaceutical Sciences, University of Eastern Piedmont, Largo Donegani 2, 28100 Novara, Italy

3 Department of Life Sciences and Biotechnology, University of Ferrara, Piazzale Chiappini 3, 44123 Ferrara, Italy

4 Department of Chemistry, University of Pavia, Via Taramelli 12, 27100 Pavia, Italy

§ equal contribution

**Content**

**Figure S1.** 1H NMR 400 MHz of the squalene enriched fraction in CDCl3

**Figure S2.** Peak purity of squalene reference standard (*tR*28.5 min) (A), compared to the corresponding one in a hemp leaf extract from the CBC-type variety (sample 3) (B).

**Figure S3.** GC-MS mass spectra of squalene standard (A), compared to the corresponding one in a hemp leaf extract from the CBC-type variety (sample 3) (B).

**Table S1.** Complete list of PFs investigated in hemp leaf extracts by UHPLC-HRMS.

**Table S2.** Complete list of acidic CBs and their esters investigated in hemp leaf extracts by UHPLC-HRMS.

**Table S3.** Complete list of neutral CBs investigated in hemp leaf extracts by UHPLC-HRMS.

**Table S4.** List of PCs detected in hemp leaf extracts by HPLC-ELSD.

**Table S5**. Completelist of terpenes investigated in hemp leaf extracts by GC-MS.

**Fig S1**: 1H NMR (400 MHz) of the squalene enriched fraction in CDCl3.

**A**

**B**

**Fig S2.** Peak purity of squalene reference standard (*tR*28.5 min) (A), compared to the corresponding one in a hemp leaf extract from the CBC-type variety (sample 3) (B).

**A**

**B**

**Fig S3.** GC-MS mass spectra of squalene standard (A), compared to the corresponding one in a hemp leaf extract from the CBC-type variety (sample 3) (B).

| **Table S1.** Complete list of PFs investigated in hemp leaf extracts by UHPLC-HRMS | | | | |
| --- | --- | --- | --- | --- |
| **Compound** | **Sample 1** | **Sample 2** | **Sample 3** | **Sample 4** |
| Hydroxybenzoic acid | – | – | – | – |
| *N*-*p*-Coumaroyloctopamine | – | – | – | – |
| *N*-Feruloyloctopamine | – | + | + | + |
| Coumaric acid | – | – | – | – |
| Dihydroferulic acid | + | + | + | + |
| Hydroxygallic acid | + | + | + | + |
| *N*-Coumaroyltyramine | + | + | + | + |
| *N*-*cis*-Feruloyltyramine | + | + | + | + |
| *N*-Feruloyl-3-*O*-methyldopamine | – | – | – | – |
| *N*-Coumaroyltyramine | + | + | + | + |
| *N*-*trans-*Feruloyltyramine | + | + | + | + |
| Terrestriamide | – | – | – | – |
| Deoxyrhapontigenin (4’-*O*-methylresveratrol) | – | – | – | – |
| Apigenin | + | + | + | + |
| Diosmetin/chrysoeriol | + | + | + | + |
| Cannabisin F | – | – | – | – |
| Cannflavine derivative | + | + | + | + |
| Cannflavine derivative | + | + | + | + |
| Acacetin | – | – | – | + |
| Isocannflavin B | + | – | – | – |
| Hydroxymatairesinol/ nortrachelogenin | – | – | – | – |
| Cannflavine derivative | + | + | + | + |
| Cannflavine derivative | + | + | + | + |
| Cannflavine derivative | + | + | + | + |
| Cannflavine derivative | + | + | + | + |
| Demethoxy CFL-B | + | + | + | + |
| Cannflavin B (CFL-B) | + | + | + | + |
| Canniprene | – | + | + | + |
| Cannflavin derivative | – | – | – | – |
| Cannflavin C (CFL-C) | + | + | + | + |
| Demethoxy CFL-A | + | + | + | + |
| Cannflavin A (CFL-A) | + | + | + | + |

| **Table S2.** Complete list of acidic CBs and their esters investigated in hemp leaf extracts by UHPLC-HRMS | | | | |
| --- | --- | --- | --- | --- |
| **Compound** | **Sample 1** | **Sample 2** | **Sample 3** | **Sample 4** |
| CBNDVA | – | – | – | – |
| CBNDA | + | + | + | + |
| CBDVA | + | – | – | + |
| CBEA | – | – | – | – |
| CBDBA | + | + | + | + |
| CBDA | + | + | + | + |
| CBGA | + | + | + | + |
| CBDA geraniol ester | – | – | – | – |
| CBDHA | + | – | – | – |
| CBNVA | – | – | – | – |
| CBDPA | + | – | – | – |
| THCVA | + | + | – | – |
| CBCVA | + | + | + | – |
| CBDA borneol ester | + | + | – | – |
| CBNA | + | + | + | + |
| THCA | + | + | + | – |
| CBDA nerol ester | – | – | – | – |
| CBDA fenchol ester | – | – | – | – |
| CBGMA | + | + | – | + |
| CBCA | + | + | + | + |
| CBGHA | – | – | – | – |
| CBGPA | – | – | – | – |

| **Table S3.** Complete list of neutral CBs investigated in hemp leaves extracts by UHPLC-HRMS | | | | |
| --- | --- | --- | --- | --- |
| **Compound** | **Sample 1** | **Sample 2** | **Sample 3** | **Sample 4** |
| CBND | – | – | – | – |
| CBDV | + | – | – | – |
| CBNRV | – | – | – | – |
| CBGV | – | – | – | – |
| CBNRB | – | – | – | – |
| CBE | – | – | – | – |
| CBGB | – | – | – | – |
| CBDB | + | – | – | – |
| CBNR | – | – | – | – |
| CBG | + | + | + | + |
| CBD | + | + | + | + |
| THCV | – | + | + | – |
| CBDH | + | – | – | – |
| THCB | – | – | – | – |
| CBCB | – | – | – | – |
| CBNRP | – | – | – | – |
| CBGP | + | + | – | – |
| CBN | + | + | – | – |
| CBDP | + | – | – | – |
| CBTC | + | + | + | + |
| Δ9-THC | + | + | + | + |
| sesqui-CBG | + | + | + | + |
| CBC | + | + | + | + |
| CBGH | + | + | – | – |

| **Table S4.** List of PCs detected in hemp leaf extracts by HPLC-ELSD | | | | |
| --- | --- | --- | --- | --- |
| **Sample** | **Sample 1** | **Sample 2** | **Sample 3** | **Sample 4** |
| C22OH | – | – | – | + |
| C24OH | + | – | + | + |
| C26OH | + | – | – | + |
| C28OH | + | + | + | + |
| C30OH | + | + | + | + |
| C32OH | + | + | + | + |

| **Table S5.** Complete list of terpenes detected in hemp leaf extracts by GC-MS | | | | | | | | |
| --- | --- | --- | --- | --- | --- | --- | --- | --- |
| **Compound** | | **Sample 1** | | **Sample 2** | | **Sample 3** | | **Sample 4** |
| -Pinene | | + | | – | | – | | + |
| -Myrcene | | + | | + | | – | | + |
| Camphene | | – | | – | | – | | + |
| Terpinolene | | – | | – | | – | | + |
| Limonene | | + | | + | | + | | + |
| Fenchyl alcohol | | + | | – | | – | | + |
| Borneol | | – | | – | | – | | + |
| -Caryophyllene | | + | | + | | + | | + |
| -Humulene | | + | | + | | + | | + |
| Caryophyllene oxide | | + | | + | | + | | + |
| -Bisabolol | | + | | – | | + | | + |
| Ocimene | | – | | – | | + | | – |
| *trans*-Nerolidol | | – | | – | | + | | – |
| *cis*-Nerolidol | | – | | + | | + | | – |
| Valencene | | – | | – | | + | | – |
| Guaiol | | – | | + | | – | | – |
| Cedrol | | – | | + | | – | | – |
| Farnesene | | – | | + | | – | | – |
| -Phellandrene | | – | | – | | – | | – |
| Eucaliptol | | + | | – | | – | | – |
| Linalool | | – | | – | | – | | – |
| Fenchone | | – | | – | | – | | – |
| Camphor | | – | | – | | – | | – |
| Isopulegol | | – | | – | | – | | – |
| Isoborneol | | – | | – | | – | | – |
| Menthol | | – | | – | | – | | – |
| Nerol | | – | | – | | – | | – |
| Geranyl acetate | | – | | – | | – | | – |
| Sabinene | | – | | – | | – | | – |
| -Pinene | | – | | – | | – | | – |
| -Terpinene | | – | | – | | – | | – |
| -Terpinene | | – | | – | | – | | – |
| Terpineol | | – | | – | | – | | – |
| Pulegone | | – | | – | | – | | – |
| Geraniol | | – | | – | | – | | – |
|  |  | |  | |  | |  | |
